# Supplementary material
Source: HighWire-hosted journal article supplement (https://bmjopen.bmj.com/content/10/8/e034512)
Supplement: inline-supplementary-material-1 [file inline-supplementary-material-1.pdf]

**Appendix Table 1: Robustness checks**

| Dependent variable:<br>logLOS |                             |                        |                         |                        |
|-------------------------------|-----------------------------|------------------------|-------------------------|------------------------|
| VARIABLES                     | Control for insurance tiers |                        | Change in outlier bound |                        |
|                               | Full sample                 | Public insurance       | Full sample             | Public insurance       |
| Poverty rate                  | -0.0071***<br>[0.0006]      | -0.0112***<br>[0.0024] | -0.0085***<br>[0.0008]  | -0.0132***<br>[0.0036] |
| Poverty rate Squared          | 0.0001***<br>[0.0000]       | 0.0002***<br>[0.0000]  | 0.0001***<br>[0.0000]   | 0.0002**<br>[0.0001]   |
| Public insurance indicator    | 0.0593<br>[0.0874]          |                        | 0.0045<br>[0.0293]      |                        |
| Public hospital indicator     | 0.3429***<br>[0.0821]       | 0.4277***<br>[0.1031]  | 0.3911***<br>[0.0795]   | 0.4902***<br>[0.0987]  |
| Observations                  | 1,033,222                   | 770,890                | 1,040,716               | 777,220                |

Notes: All regressions include the following controls: age, age squared, an indicator for female, an indicator for medical complexity condition, indicator for rural municipality, year and region fixed effects. Standard errors, clustered at the region level. \*\*\* p<0.01, \*\* p<0.05, \* p<0.1

**Appendix Table 2: Fixed effects models for poverty and length of stay - Hospital Clusters**

| Dependent variable:<br>logLOS | Full Sample           | Public insurance      | Full Sample            | Public insurance       |
|-------------------------------|-----------------------|-----------------------|------------------------|------------------------|
|                               | region FE             |                       | municipality FE        |                        |
| Poverty rate                  | -0.0070**<br>[0.0032] | -0.0108**<br>[0.0048] | -0.0072***<br>[0.0027] | -0.0095***<br>[0.0034] |
| Poverty rate Squared          | 0.0001*<br>[0.0001]   | 0.0002*<br>[0.0001]   | 0.0001**<br>[0.0001]   | 0.0002**<br>[0.0001]   |
| Public insurance indicator    | 0.0002<br>[0.0375]    |                       | -0.0145<br>[0.0297]    |                        |
| Public hospital indicator     | 0.3776***<br>[0.0481] | 0.4759***<br>[0.0669] | 0.4011***<br>[0.0378]  | 0.5139***<br>[0.0492]  |
| Observations                  | 1,033,222             | 770,890               | 1,033,222              | 770,890                |

Notes: All regressions include the following controls: age, age squared, an indicator for female, an indicator for medical complexity condition, indicator for rural municipality, year fixed effects. Columns (1) and (2) include region fixed effects and columns (3) and (4) include municipality fixed effects. Standard errors are clustered at the hospital level. \*\*\* p<0.01, \*\* p<0.05, \* p<0.1
